# Supplementary material for: Biodegradation of polyethylene in digestive gland homogenates of marine invertebrates
Source: PeerJ. 2024 Feb 26;12:e17041. doi: 10.7717/peerj.17041 (PMC10903337; doi:10.7717/peerj.17041)
Supplement: Supplemental Information 1 [file peerj-12-17041-s001.xlsx]

## Sheet: Лист1
		CI (Almond, 2020)	HI (Campanale, 2023)	COI (Campanale, 2023)
	Control	0	0.0014	0.11
		0	0.019	0.021
		0	0.02	0.0679
		0	0.011	0.06
		0	0	0.07
		0	0	0.014
		0	0.029	0.0158
		0	0	0.019
		0	0	0.159
		0	0	0.024
	average value	0	0.00893333	0.0596333
	deviation	0	0.0112178	0.0496662
	P. pectinifera
		0.025	0.0013	0.204
		0.0299	0	0.176
		0.0198	0.054	0.241
		0.0143	0.0115	0.2528
		0.0405	0.011	0.386
		0.0245	0	0.231
		0.0298	0	0.176
		0.0145	0.05	0.2
		0.0198	0.011	0.399
		0.03	0.011	0.25
	average value	0.02481	0.01498	0.25158
	deviation	0.00810356	0.0201906	0.0793655
	S. nudus
		CI	HI	COI
		0.1275	0	0.0041
		0.1201	0	0.0138
		0.175	0	0.0165
		0.141	0	0.0043
		0.165	0	0.0557
		0.159	0	0.009
		0.1695	0	0.014
		0.171	0	0.0165
		0.159	0	0.0043
		0.164	0	0.054
	average value	0.15511	0	0.01922
	deviation	0.0190011	0	0.0194083
	M. yessoensis
		CI	HI	COI
		0.548	0	0.114
		0.823	0	0.197
		0.976	0	0.235
		0.625	0	0.136
		0.974	0	0.222
		0.9	0	0.21
		0.872	0	0.341
		0.641	0	0.143
		0.784	0	0.136
			0	0.168
	average value	0.793667	0	0.1902
	deviation	0.156633	0	0.0671645
